# Supplementary material for: Prognostic value of genome-wide DNA methylation patterns in noncoding miRNAs and lncRNAs in uveal melanomas
Source: publisher site journal article supplement (doi:10.18632/aging.102178), 2019-08-20
Supplement: Supplementary file [file aging-v11i16-102178-supplementary-material-SD1.pdf]

**SUPPLEMENTARY FIGURES**

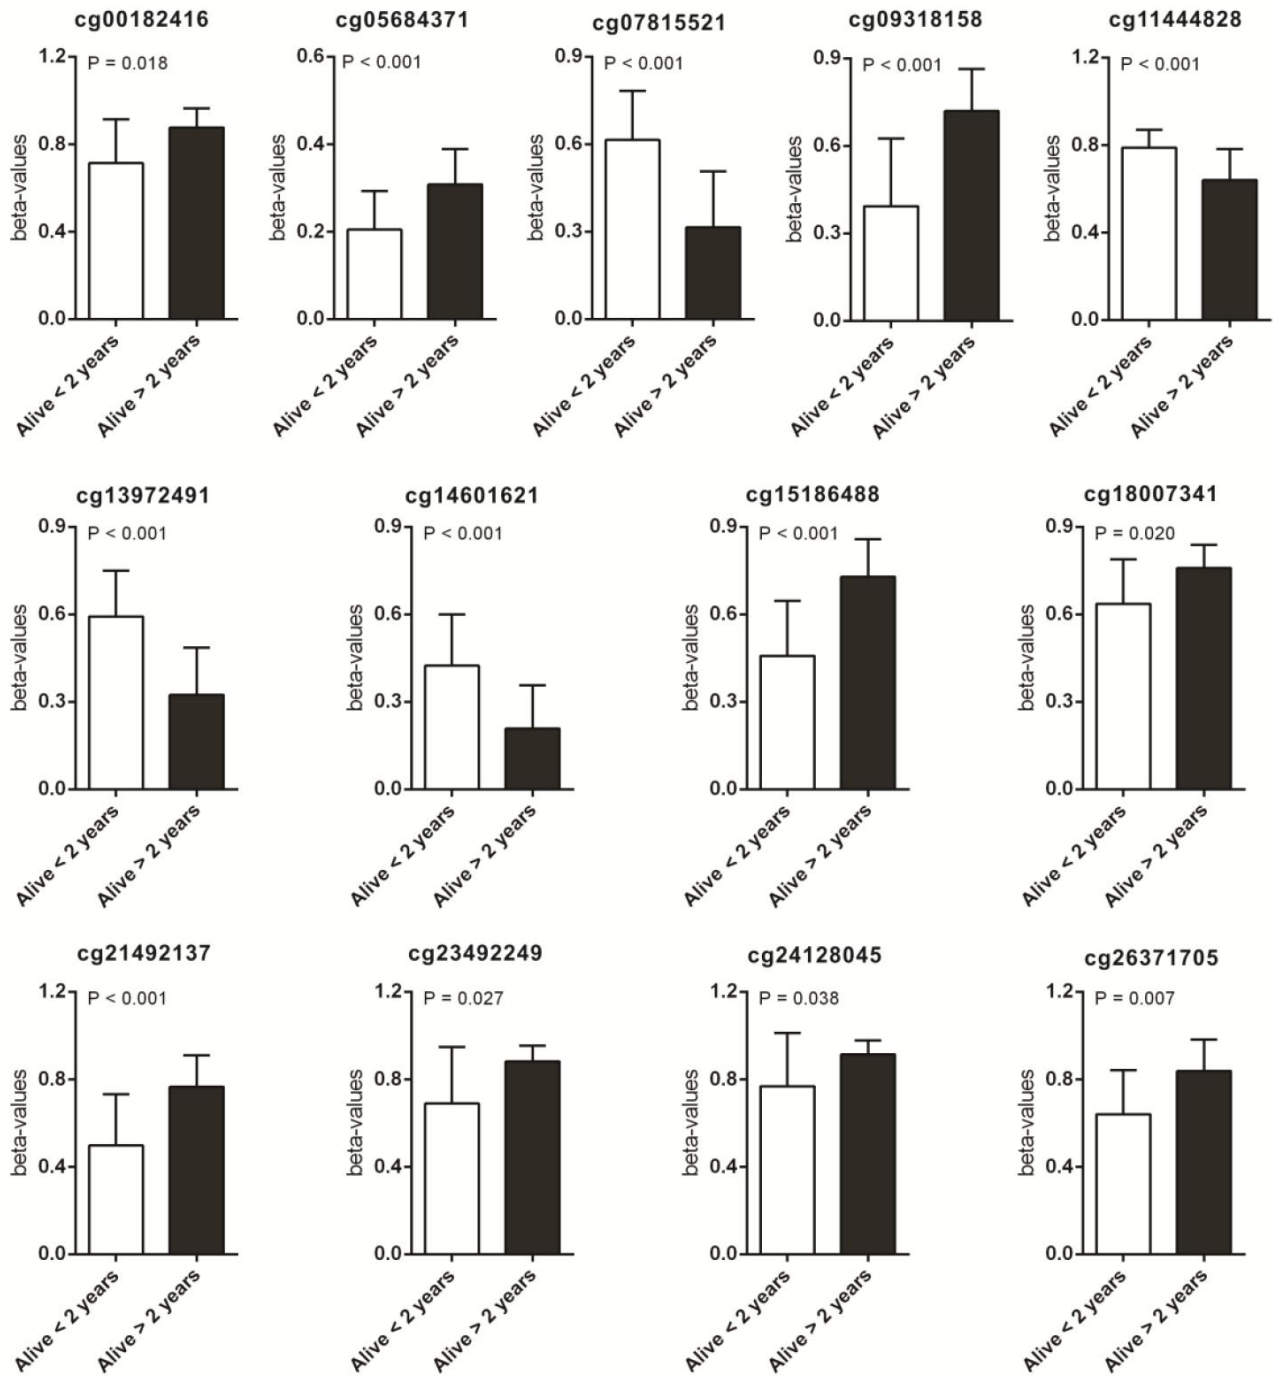

**Supplementary Figure 1. Aberrantly methylated miRNAs target genes of different prognosis group of UVMs.** The screened out 13 miRNA CpG sites from the 45 miRNA CpG sites of alive > 2 years and alive < 2 years UVM patients.

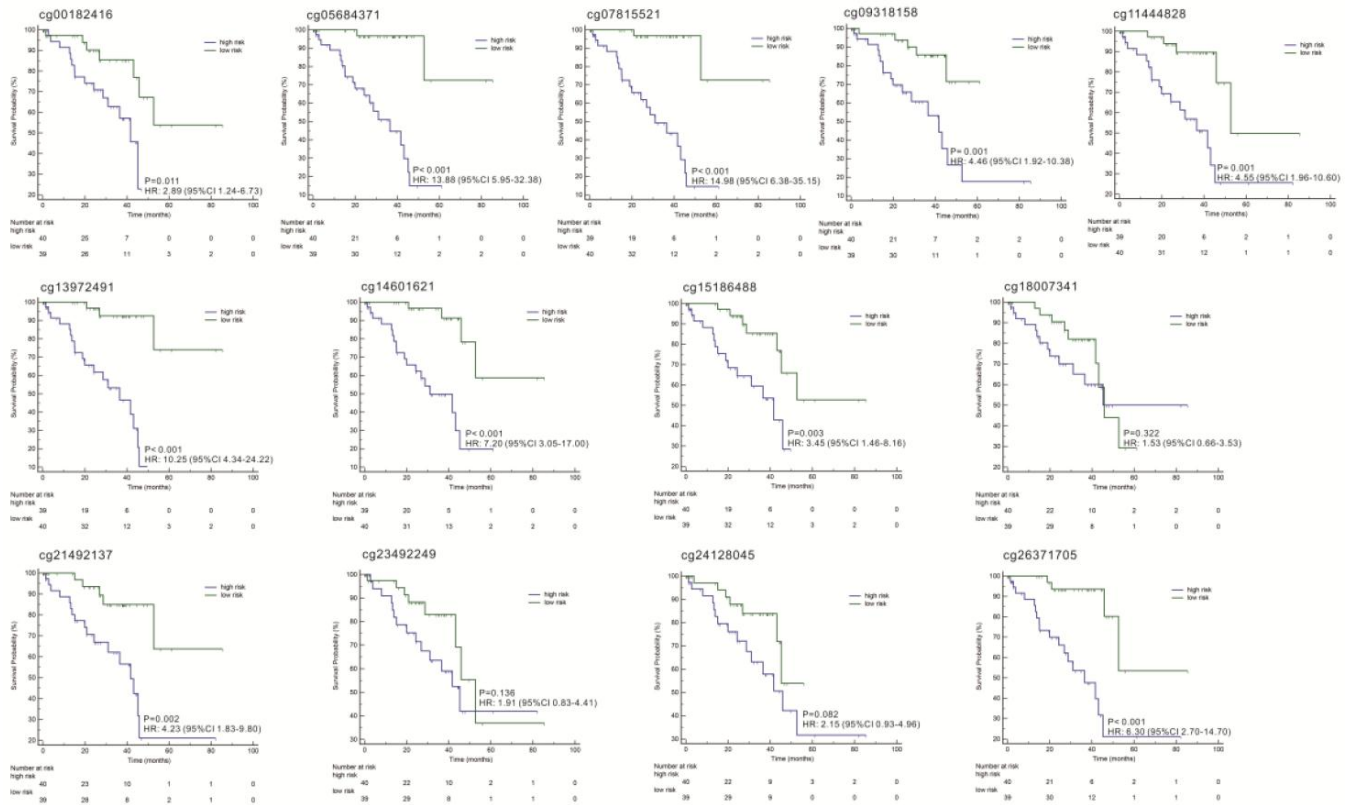

Supplementary Figure 2. Kaplan-Meier survival analysis for UVMs according to the screened out 13 miRNA CpG sites.

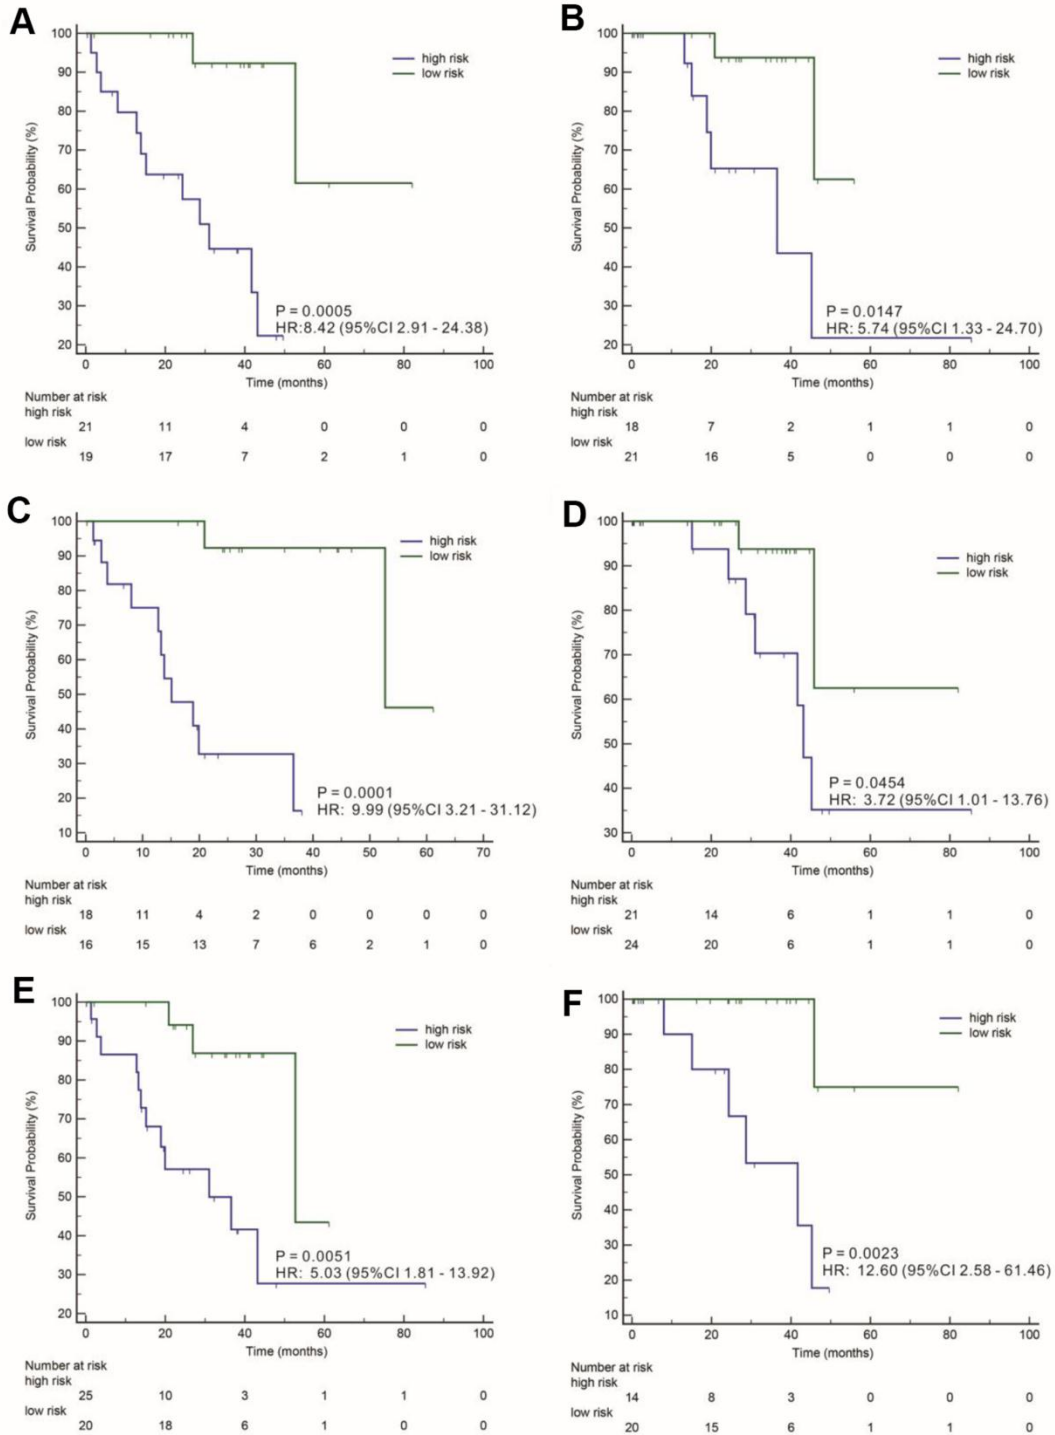

Supplementary Figure 3. Kaplan-Meier survival analysis for UVMs according to the different miRNAs-classifiers.

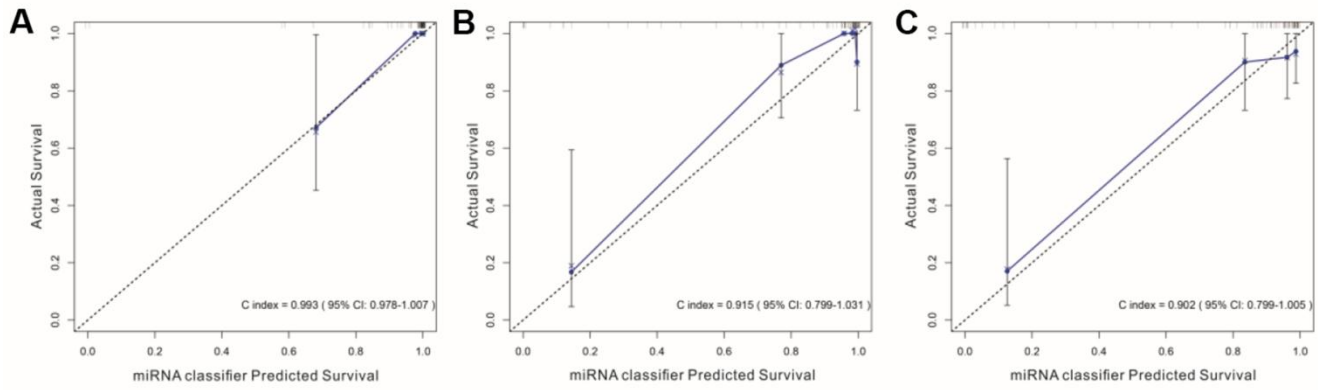

Supplementary Figure 4. Calibration of miRNAs-CpG-classifier.

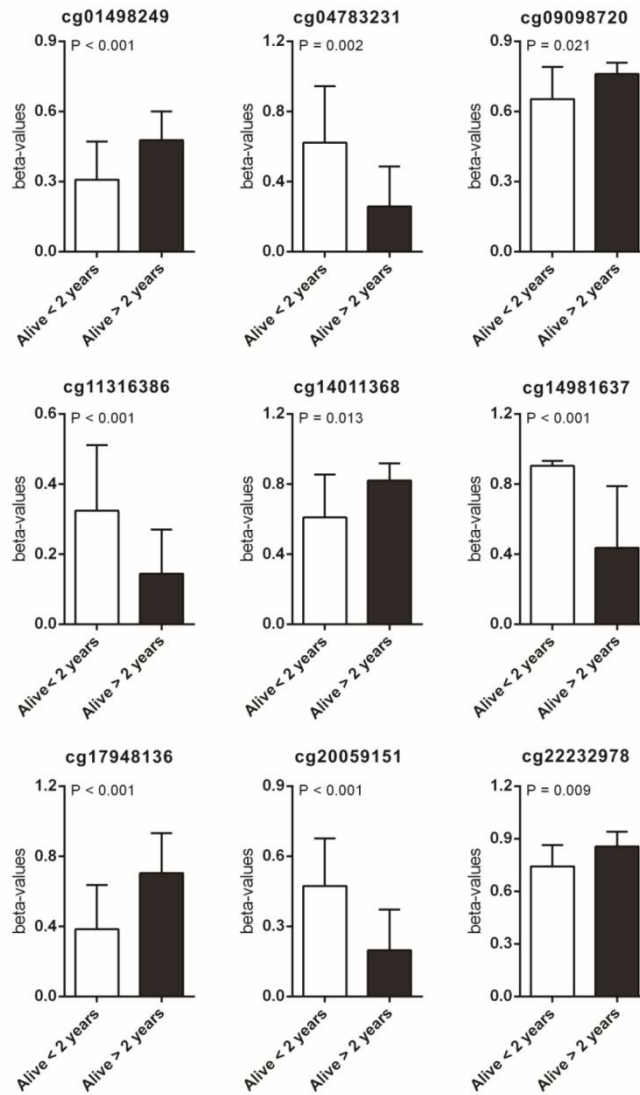

Supplementary Figure 5. Aberrantly methylated genes co-expressing with lncRNAs of different prognosis group of UVMs. The screened out 9 lncRNA CpG sites from the 33 lncRNA CpG sites of alive > 2 years and alive < 2 years UVM patients.

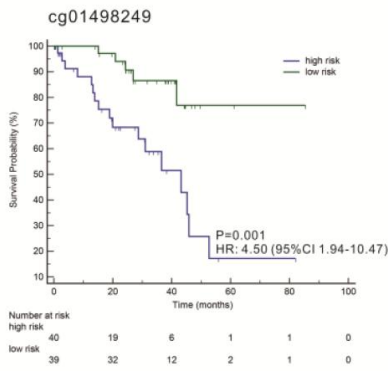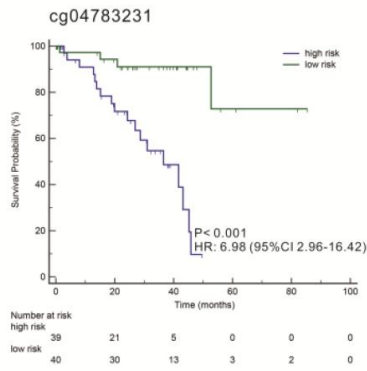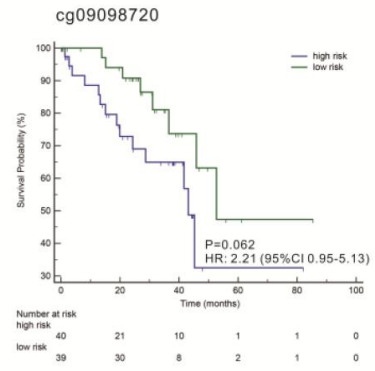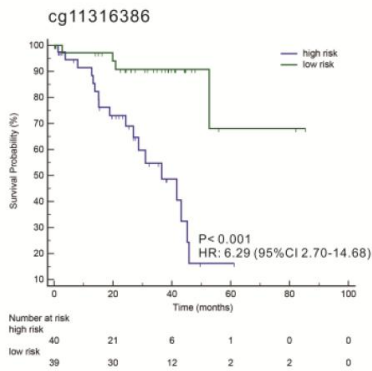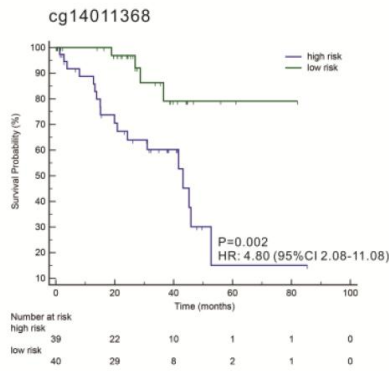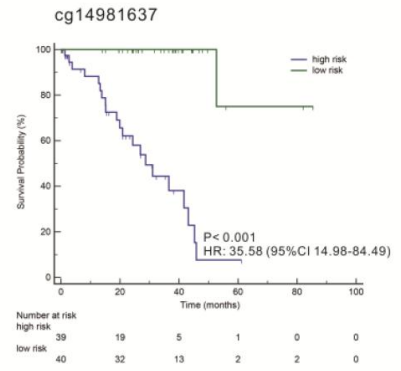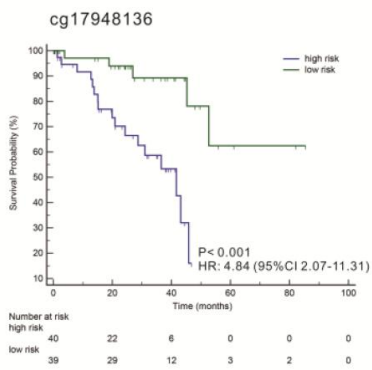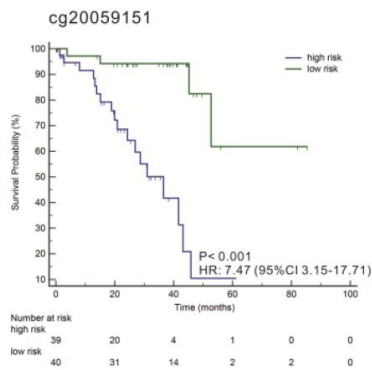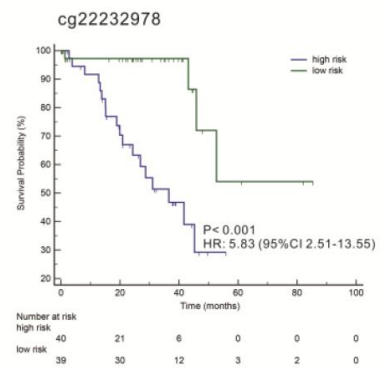

Supplementary Figure 6. Kaplan-Meier survival analysis for UVMs according to the screened out 9 miRNA CpG sites.

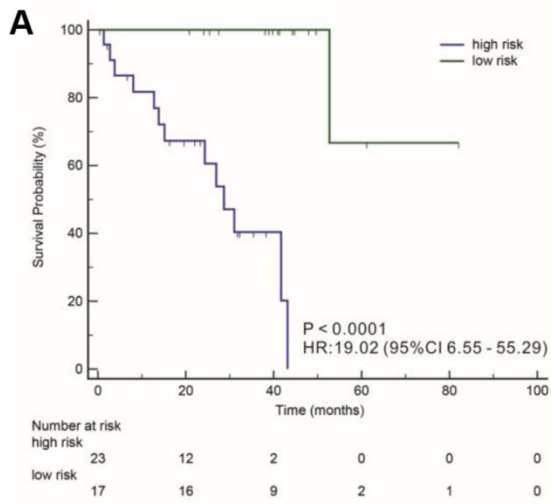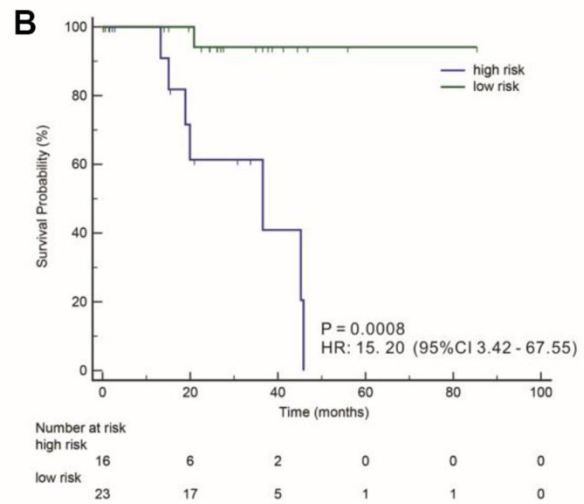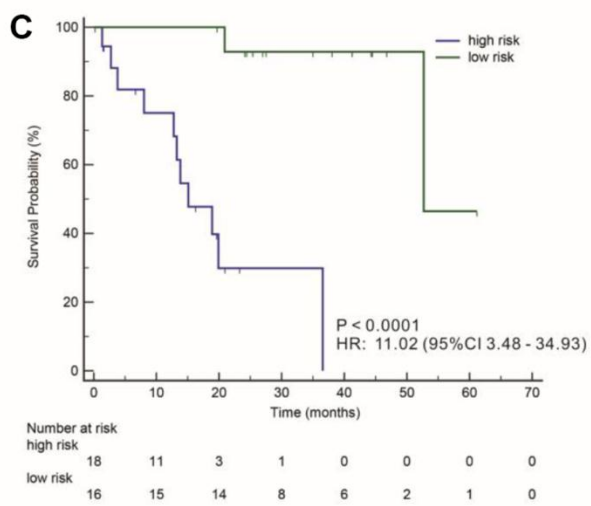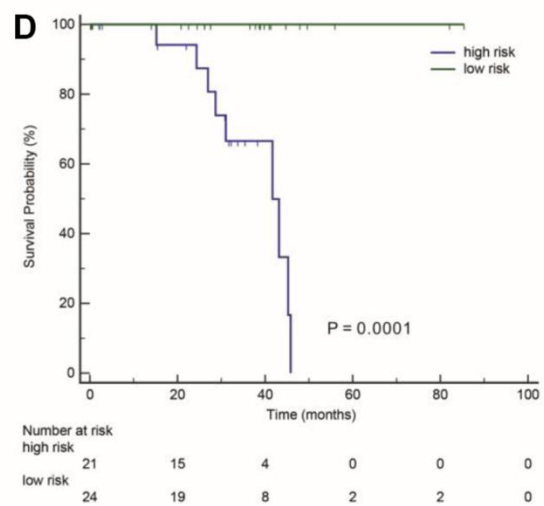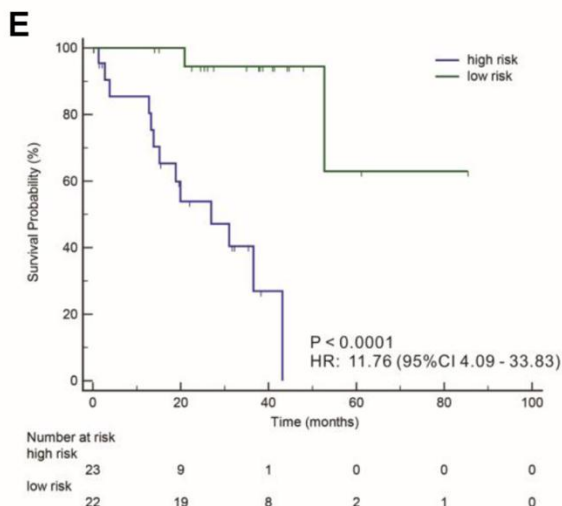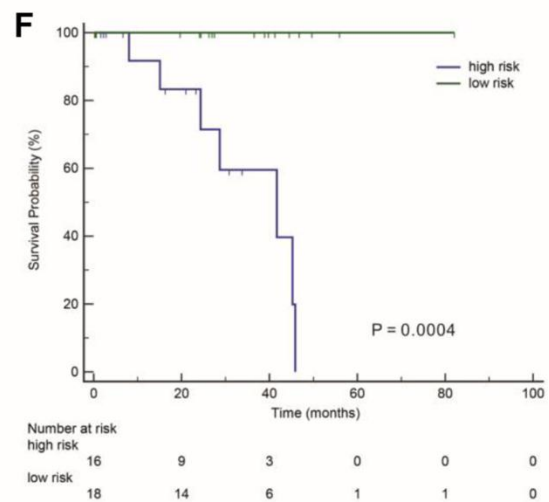

Supplementary Figure 7. Kaplan-Meier survival analysis for UVMs according to the different lncRNAs-classifiers.

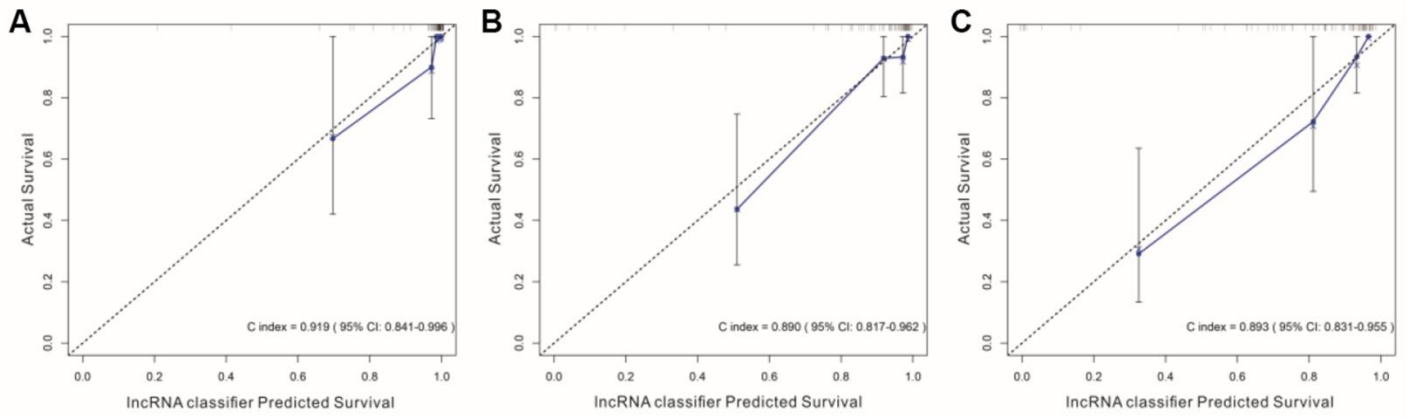

Supplementary Figure 8. Calibration of lncRNAs-CpG-classifier.
