# Supplementary material for: Prognostic value of genome-wide DNA methylation patterns in noncoding miRNAs and lncRNAs in uveal melanomas
Source: publisher site journal article supplement (doi:10.18632/aging.102178), 2019-08-20
Supplement: Supplementary file [file aging-v11i16-102178-supplementary-material-SD2.pdf]

## SUPPLEMENTARY TABLES

**Supplementary Table 1. Interaction of lncRNA signature with miRNA signature by prediction.**

| <b>Gene symbols of lncRNA</b> | <b>Gene symbols of miRNA</b>                                                                     |
|-------------------------------|--------------------------------------------------------------------------------------------------|
| AC007228.5                    | miR-516a                                                                                         |
| AC011516.2                    | miR-515, miR-519e                                                                                |
| AC079586.1                    | miR-299, miR-3074, miR-372, miR-6721                                                             |
| CTB-61M7.2                    | let-7a, miR-1323, miR-541                                                                        |
| CTC-321K16.4                  | miR-299, miR-515, miR-516a, miR-519e                                                             |
| CTC-339O9.1                   | miR-372, miR-373, miR-376b, miR-518a, miR-519b, miR-519c, miR-520c, miR-520d, miR-526a, miR-6754 |
| CTD-2291D10.4                 | miR-512, miR-654                                                                                 |
| CTD-3022G6.1                  | miR-1275, miR-373, miR-519b, miR-519c, miR-520c, miR-520d, miR-526b                              |
| LINC01057                     | miR-3074                                                                                         |
| MEG3                          | let-7a, miR-495, miR-541, miR-654                                                                |
| MEG8                          | miR-379                                                                                          |
| MIR99AHG                      | miR-516a, miR-526b                                                                               |
| RP11-1018N14.2                | miR-1283, miR-1324, miR-3074, miR-520d                                                           |
| RP11-273G15.2                 | miR-526b                                                                                         |
| RP11-76E12.1                  | miR-299, miR-379, miR-515, miR-5193, miR-519e                                                    |
| TUNAR                         | miR-5193, miR-6754                                                                               |

**Supplementary Table 2. Characteristics of miRNA CG locus filtered by LASSO.**

| CG_ID      | Gene_symbol      | CG_Chromosome_location         | Position_to_TSS   | CGI_coordinate                | Feature_type |
|------------|------------------|--------------------------------|-------------------|-------------------------------|--------------|
| cg00182416 | MIR516A2         | chr19:53760663-53760664        | TSS1500           | chr19:53768486-53768705       |              |
| cg05684371 | MIR1324          | chr3:75629873- 75629874        | TSS1500           | chr3:75618626-75619916        |              |
| cg07815521 | MIR641           | chr19: 40283950- 40283951      | TSS1500           | chr19:40284830-40285700       | N_Shore      |
| cg09318158 | MIR1283-1        | chr19: 53688356-53688357       | TSS200            | chr19:53647822-53648987       |              |
| cg11444828 | MIR6721          | chr6: 32170196- 32170197       | TSS200            | chr6:32166683-32167419        | S_Shelf      |
| cg13972491 | MIR3074          | chr9: 95086454- 95086455       | TSS1500           | chr9:95085858-95086243        | S_Shore      |
| cg14601621 | MIR3074          | chr9: 95086175- 95086176       | TSS200            | chr9:95085858-95086243        | Island       |
| cg15186488 | MIR518A2         | chr19: 53739274- 53739275      | TSS200            | chr19:53768486-53768705       |              |
| cg18007341 | MIR1275          | chr6: 34000147- 34000148       | TSS200            | chr6:34028161-34028387        |              |
| cg21492137 | MIR154<br>MIR496 | chr14: 101059602-<br>101059603 | TSS200<br>TSS1500 | chr14:101065306-<br>101066047 |              |
| cg23492249 | MIR299           | chr14: 101023683-<br>101023684 | TSS200            | chr14:101065306-<br>101066047 |              |
| cg24128045 | MIR1323          | chr19: 53671352- 53671353      | TSS1500           | chr19:53647822-53648987       |              |
| cg26371705 | MIRLET7A3        | chr22: 46111361- 46111362      | TSS1500           | chr22:46122574-46122849       |              |

CGI, CpG island.

**Supplementary Table 3. Characteristics of lncRNA CG locus filtered by LASSO.**

| CG_ID      | Gene_symbol                      | CG_chromosome_location        | Position_to_TSS    | CGI_coordinate               | Feature_type |
|------------|----------------------------------|-------------------------------|--------------------|------------------------------|--------------|
| cg01498249 | AC079779.5                       | chr2: 312940- 312941          | TSS1500            | chr2:314828-315170           | N_Shore      |
| cg04783231 | AC005498.3                       | chr19: 56539465-<br>56539466  | TSS1500            | chr19:56538306-<br>56539277  | S_Shore      |
| cg09098720 | RP11-1018N14.1<br>RP11-1018N14.2 | chr17: 51335481-<br>51335482  | TSS1500<br>TSS1500 | chr17:51259741-<br>51261222  |              |
| cg11316386 | C1orf229                         | chr1: 247112506-<br>247112507 | TSS200             | chr1:247111283-<br>247112455 | S_Shore      |
| cg14011368 | TUNAR                            | chr14: 95875201-<br>95875202  | TSS1500            | chr14:95875872-<br>95877233  | N_Shore      |
| cg14981637 | LINC01057                        | chr1: 94821571- 94821572      | TSS1500            | chr1:94820046-<br>94820763   | S_Shore      |
| cg17948136 | CTD-2291D10.4                    | chr19: 23074517-<br>23074518  | TSS1500            | chr19:23075155-<br>23075716  | N_Shore      |
| cg20059151 | LINC01057                        | chr1: 94820755- 94820756      | TSS1500            | chr1:94820046-<br>94820763   | Island       |
| cg22232978 | AC096579.13                      | chr2: 88861913- 88861914      | TSS1500            | chr2:88764976-<br>88765996   |              |

CGI, CpG island.

**Supplementary Table 4. KM analyses of miRNA CpG methylation for overall survival.**

| <b>CG_ID<br/>(high vs. low risk)</b> | <b>HR</b> | <b>95% CI</b> | <b>P value</b> |
|--------------------------------------|-----------|---------------|----------------|
| cg00182416                           | 2.89      | 1.24-6.73     | 0.011          |
| cg05684371                           | 13.88     | 5.95-32.38    | < 0.001        |
| cg07815521                           | 14.98     | 6.38-35.15    | < 0.001        |
| cg09318158                           | 4.46      | 1.92-10.38    | 0.001          |
| cg11444828                           | 4.55      | 1.96-10.60    | 0.001          |
| cg13972491                           | 10.25     | 4.34-24.22    | < 0.001        |
| cg14601621                           | 7.20      | 3.05-17.00    | < 0.001        |
| cg15186488                           | 3.45      | 1.46-8.16     | 0.003          |
| cg18007341                           | 1.53      | 0.66-3.53     | 0.322          |
| cg21492137                           | 4.23      | 1.83-9.80     | 0.002          |
| cg23492249                           | 1.91      | 0.83-4.41     | 0.136          |
| cg24128045                           | 2.15      | 0.93-4.96     | 0.082          |
| cg26371705                           | 6.30      | 2.70-14.70    | < 0.001        |

KM, Kaplan-Meier; HR, Hazard ratio; CI, confidence interval.

**Supplementary Table 5. KM analyses of lncRNA CpG methylation for overall survival.**

| <b>CG_ID<br/>(high vs. low risk)</b> | <b>HR</b> | <b>95% CI</b> | <b>P value</b> |
|--------------------------------------|-----------|---------------|----------------|
| cg01498249                           | 4.50      | 1.94-10.47    | 0.001          |
| cg04783231                           | 6.98      | 2.96-16.42    | < 0.001        |
| cg09098720                           | 2.21      | 0.95-5.13     | 0.062          |
| cg11316386                           | 6.29      | 2.70-14.68    | < 0.001        |
| cg14011368                           | 4.80      | 2.08-11.08    | 0.002          |
| cg14981637                           | 35.58     | 14.98-84.49   | < 0.001        |
| cg17948136                           | 4.84      | 2.07-11.31    | < 0.001        |
| cg20059151                           | 7.47      | 3.15-17.71    | < 0.001        |
| cg22232978                           | 5.83      | 2.51-13.55    | < 0.001        |

HR, Hazard ratio; CI, confidence interval.
